# Supplementary material
Source: PubMed Central journal article supplement (PMC4371976)
Supplement: pnas.201415126SI.pdf [file pnas.201415126SI.pdf]

# Supporting Information

Silayeva et al. 10.1073/pnas.1415126112

## SI Materials and Methods

**Animal Care.** All animal studies were performed with protocols approved by the Institutional Animal Care and Use Committee of Tufts New England Medical Center.

**Behavioral Assessments.** The open field task provides a measure of the baseline activity levels of an animal, as well as its habituation response to the novel environment. Activity levels were monitored for 30 min. The rotarod task, measuring the length of time an animal can stay on a moving rod, provides an indication of the motor coordination of that animal. Mice were tested at three different speeds: 18, 24, and 28 rpm. These experiments were performed as described previously (1).

**Cultured Neuron Preparation, Immunoprecipitation, Immunoblotting, and Immunohistochemistry.** Hippocampal neurons were dissected from rodent embryos at embryonic day 18 as described previously. Cultures were maintained in neurobasal medium supplemented with B-27 neural supplement and 2 mM l-glutamine for 3 wk before the experiments. KCC2 was immunoprecipitated from detergent-solubilized brain extracts using the respective primary antibodies conjugated to protein A-Sepharose. Immunoblots were visualized using ECL and quantified using a Fuji LAS 3000 imager. Hippocampal sections were stained with KCC2 antibodies followed by HRP-conjugated secondary antibodies and visualized with DAB staining. Images were taken with an Olympus BX51 microscope at 10 $\times$  magnification and quantified with Metamorph software (Molecular Devices). The methods were as previously described (1, 2). For Western blotting, Neuromab 75-013 anti-KCC2 was used, and pS940 antibody was obtained from PhosphoSolutions (p1551-940) (3). Tubulin and actin antibodies were from Sigma.

## Electrophysiology.

**Low magnesium extracellular field recordings.** Horizontal slices (400  $\mu$ m) containing the entorhinal cortex and hippocampus were prepared from 3- to 5-wk-old male C57BL6 WT ( $n = 8$ ) and S940A ( $n = 3$ ) mice. Mice were anesthetized with isoflurane and brains were removed and cut in ice-cold cutting solution on a Leica VT1000s vibratome. The cutting solution contained (in millimoles): NaCl 126, NaHCO<sub>3</sub> 26, NaH<sub>2</sub>PO<sub>4</sub> 1.25, KCl 2.5, MgCl<sub>2</sub> 2, CaCl<sub>2</sub> 0.5, Na-pyruvate 1.5, and glucose 10. Slices were placed in a submerged chamber for a 60-min recovery period at 32  $^{\circ}$ C in normal ACSF containing (in millimoles): NaCl 126, NaHCO<sub>3</sub> 26, KCl 5, MgCl<sub>2</sub> 2, CaCl<sub>2</sub> 2, glutamine 1, NaH<sub>2</sub>PO<sub>4</sub> 1.25, Na-pyruvate 1.5, and glucose 10. Slices were then transferred to a Warner Instruments recording chamber (RC-27L) and perfused for 15 min with normal ACSF (2 mL/min, 32  $^{\circ}$ C) before changing to ACSF containing no MgCl<sub>2</sub>. All solutions were bubbled with 95% (vol/vol) O<sub>2</sub>/5% (vol/vol) CO<sub>2</sub> gas mixture. Field recordings were made with NaCl (154 mM) filled electrodes from the medial entorhinal cortex layers III/IV. Recordings were performed with a Multiclamp 700B amplifier (Molecular Devices) with Clampex 10 acquisition software (Molecular Devices). Data were filtered at 10 kHz and analyzed offline with Clampfit (Molecular Devices).

**Cultured neuron recordings.** Bath saline contained (in millimoles) 140 NaCl, 2.5 KCl, 2.5 CaCl<sub>2</sub>, 1.2 MgCl<sub>2</sub>, 10 Hepes, 11 glucose, pH 7.4 NaOH. Stocks of furosemide were dissolved in DMSO (0.1% final concentration), glutamate in 1 M HCl (in saline, balanced with vol/vol 1 M NaOH), and AP5 in 1 M NaOH (in saline, balanced with vol/vol 1 M HCl); all of these compounds were purchased from Tocris Bioscience. We used a three-barreled (0.7-mm diameter per barrel) glass perfusion pipette placed just

above the target neuron to apply all compounds and control saline. These solutions were applied through the perfusion pipette at a rate of 0.5 mL/min and we used a computer-controlled perfusion fast-step device (Warner Instruments) to ensure fast and complete exchange of solutions. To ensure that solutions equilibrated faster, the only source of solution was the perfusion pipette; the bath inlet pipe was not flowing.

**Obtaining  $E_{GABA}$  values.** In acute slices, we performed steady-state current-voltage protocols to obtain  $E_{GABA}$  values. Glass micro-pipettes were filled with 10  $\mu$ M muscimol, which was applied locally by pressure ejection with a picospritzer to activate GABA<sub>A</sub>-mediated currents at voltages between  $-100$  to  $-50$  mV in 10-mV increments. In cultured neurons, we used voltage-ramp protocols to determine  $E_{GABA}$  values. We first performed a voltage ramp in the absence of muscimol to measure the background leak currents, followed 10 s later by a second voltage ramp in the presence of muscimol. We ramped the holding potential from  $-100$  to  $-70$  mV or  $-90$  to  $-60$  mV (20 mV/s) when muscimol was hyperpolarizing and we ramped the holding potential from  $-60$  to  $-30$  mV (20 mV/s) when muscimol was depolarizing. We performed off-line leak subtraction to isolate the muscimol-activated currents, which we plotted against the holding potential to obtain I-V relationships. For both steady-state and voltage-ramp procedures, we then obtained  $E_{GABA}$  values from linear regression fits to the data at voltages near the observable reversal potential. All slice and cultured neuron recordings were performed using the perforated patch-clamp technique. We used gramicidin D (50  $\mu$ g/mL, Sigma Aldrich, final DMSO concentration was 0.1%) to establish access resistances between 20 and 60 M $\Omega$  throughout the recording period. All recordings were performed at 34  $^{\circ}$ C. The recording pipettes were filled with saline containing (in millimoles) 140 KCl and 10 Hepes, pH 7.4 KOH. Recordings were performed with a 700A Multiclamp amplifier or a 200B Axopatch amplifier (Molecular Devices) and data were acquired with Clampex 10 software and analyzed with Clampfit. All records were filtered at 2 kHz and digitized at 10 kHz.

**Selection criteria of cultured neurons.** All of the data are presented as replicates of experiments performed on the same cultured hippocampal 18–21 DIV neurons. Due to the variability of neurons in culture, we only patched pyramidal-shaped neurons. We also used adapted selection criteria (4). Briefly, if neurons did not meet all of these criteria they were discarded. Neurons had to maintain membrane potential values less than  $-50$  mV in I = 0 mode to ensure health; neurons had to reestablish membrane potential values less than  $-50$  mV within 1 min after exposure to glutamate or furosemide to ensure proper function of the Na<sup>+</sup>/K<sup>+</sup> ATPase; and neurons had to exhibit GABAergic hyperpolarizing postsynaptic potentials and muscimol responses under basal conditions.

**Protocols to obtain rates of Cl<sup>-</sup> extrusion.** The neurons were patched and monitored for basal activity to determine if they met the selection criteria as mentioned in the preceding section. The following sequence was performed for cells exposed to glutamate: (i) measure  $E_{GABA}$  in voltage-clamp mode, (ii) obtain basal muscimol responses for 2 min (500-ms pulses spaced 20 s apart) in I = 0 mode, (iii) three 10-s pulses of glutamate in I = 0 mode, (iv) measure the muscimol responses every 20 s in control saline for the first 20 s and in the presence of TTX for 4 min in I = 0 mode, (v) measure  $E_{GABA}$  in voltage-clamp mode, (vi) washout TTX for 5 min while recording in I = 0 mode, (vii) three 10-s pulses of glutamate in I = 0 mode, and (viii) measure  $E_{GABA}$  in voltage-clamp mode. The following sequence was performed for
